# Supplementary material for: Regional brain volume differences between males with and without autism spectrum disorder are highly age-dependent
Source: PubMed Central journal article supplement (PMC4455336; doi:10.1186/s13229-015-0022-3), 2015-05-21
Supplement: 13229_2015_22_MOESM6_ESM.pdf [file 13229_2015_22_MOESM6_ESM.pdf]

**Additional file 6: Table S6** Global brain volume differences

| Volume (mm <sup>3</sup> ) | Mean (SD)      |                | F <sub>(2,174)</sub> | p value |
|---------------------------|----------------|----------------|----------------------|---------|
|                           | ASD Group      | TDC Group      |                      |         |
| <b>Total GM</b>           | 796.4 (66.5)   | 784.3 (61.6)   | 1.58                 | 0.211   |
| <b>Total WM</b>           | 520.4 (46.0)   | 511.9 (39.2)   | 1.73                 | 0.190   |
| <b>Total CSF</b>          | 352.5 (55.2)   | 336.5 (35.0)   | 5.28                 | 0.023   |
| <b>Total brain</b>        | 1316.8 (104.0) | 1296.2 (88.7)  | 2.00                 | 0.159   |
| <b>Total Intracranial</b> | 1669.3 (143.0) | 1632.7 (108.1) | 3.67                 | 0.057   |

Abbreviations: ASD, autism spectrum disorder; TDC, typically developing control; GM, gray matter; WM, white matter; CSF, cerebrospinal fluid; SD, standard deviation.
