# Supplementary material for: Regional brain volume differences between males with and without autism spectrum disorder are highly age-dependent
Source: PubMed Central journal article supplement (PMC4455336; doi:10.1186/s13229-015-0022-3), 2015-05-21

(A) Age distribution of ASD

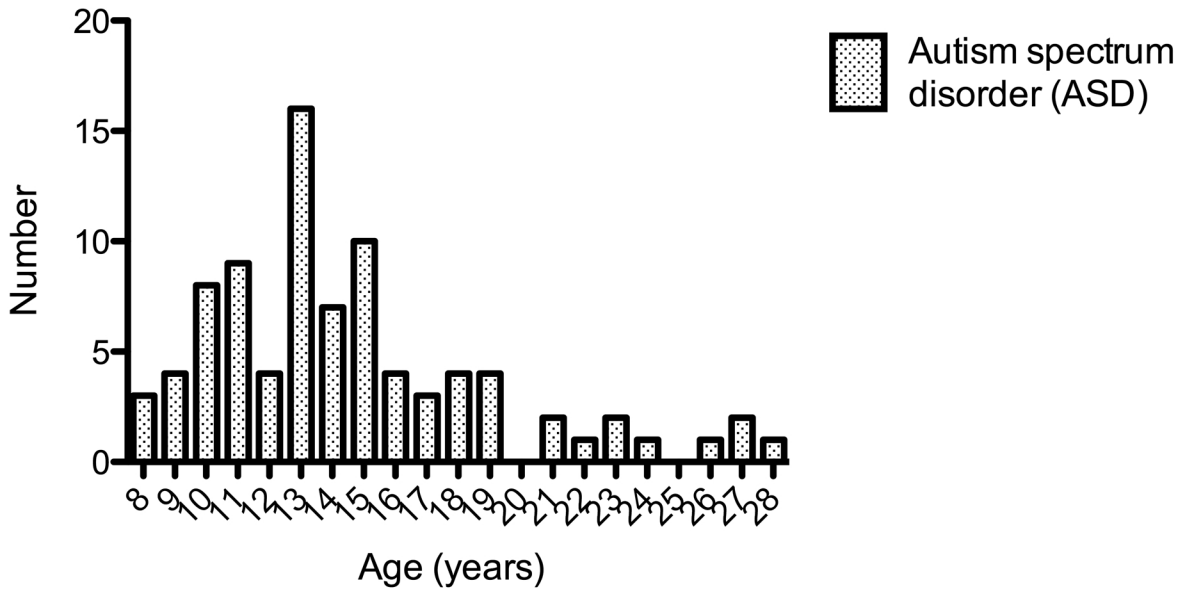

(B) Age distribution of TDC

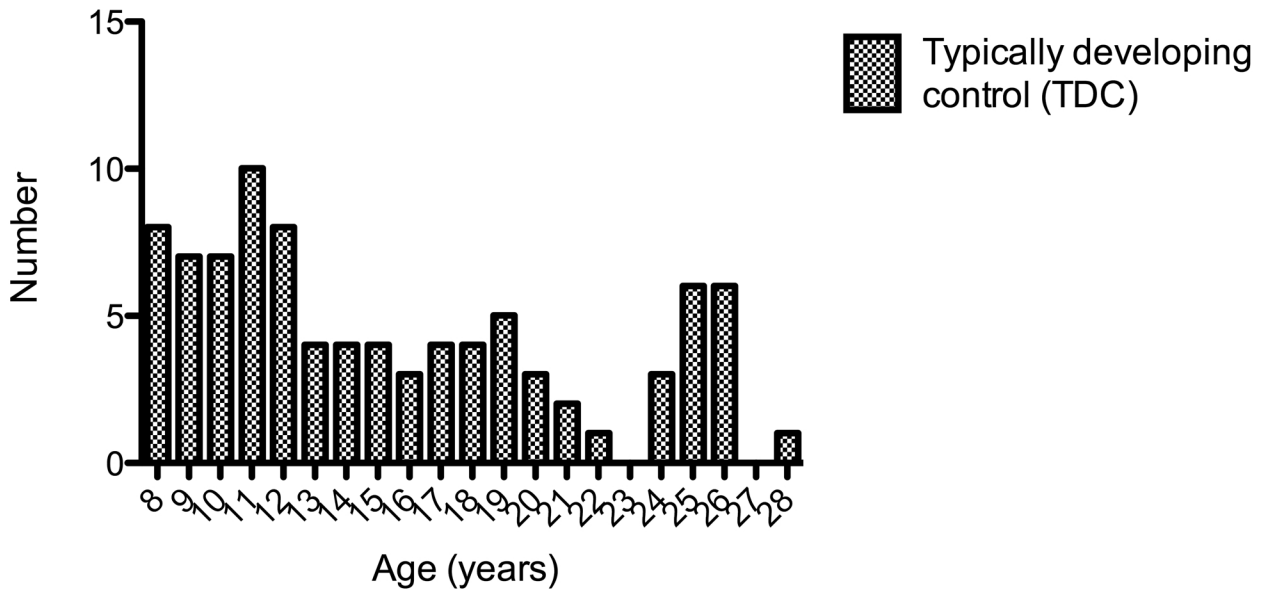

Supplement: 13229_2015_22_MOESM7_ESM.pdf [file 13229_2015_22_MOESM7_ESM.pdf]
