# Supplementary material for: Regional brain volume differences between males with and without autism spectrum disorder are highly age-dependent
Source: PubMed Central journal article supplement (PMC4455336; doi:10.1186/s13229-015-0022-3), 2015-05-21
Supplement: 13229_2015_22_MOESM9_ESM.pdf [file 13229_2015_22_MOESM9_ESM.pdf]

**Additional file 9: Table S8** Significant differences in relative regional gray matter and white matter volume between participants with ASD and TDC participants in age-stratified analyses (Model 3), only partialling out age effects as done in Model 1

| Cluster                                            | Region                 | BA  | Hemisphere | MNI coordinates |     |     | T value | Cluster-level<br>p value <sup>a</sup> | Cluster size<br>(voxels) |
|----------------------------------------------------|------------------------|-----|------------|-----------------|-----|-----|---------|---------------------------------------|--------------------------|
|                                                    |                        |     |            | x               | y   | z   |         |                                       |                          |
| <b><i>Gray Matter</i></b>                          |                        |     |            |                 |     |     |         |                                       |                          |
| <b>Model 3: Child, ASD &gt; TDC</b>                |                        |     |            |                 |     |     |         |                                       |                          |
| Limbic cluster                                     | Subcallosal gyrus      | 34  | L          | -12             | 5   | -15 | 3.96    | 0.004                                 | 684                      |
|                                                    | Sub-lobar              | ... | R          | 5               | 5   | -12 | 3.79    |                                       |                          |
|                                                    | Sub-lobar              | ... | L          | -7              | 2   | -8  | 3.75    |                                       |                          |
| <b>Model 3: Child, ASD &lt; TDC</b>                |                        |     |            |                 |     |     |         |                                       |                          |
| Right postcentral cluster                          | Postcentral gyrus      | 3   | R          | 41              | -34 | 63  | 4.31    | 0.023                                 | 512                      |
|                                                    | Postcentral gyrus      | 3   | R          | 35              | -25 | 69  | 4.21    |                                       |                          |
|                                                    | Postcentral gyrus      | 3   | R          | 30              | -34 | 64  | 4.07    |                                       |                          |
| Left parieto-occipital<br>junction cluster         | Precuneus              | 19  | L          | -27             | -82 | 39  | 4.24    | 0.014                                 | 557                      |
|                                                    | Precuneus              | 19  | L          | -34             | -82 | 34  | 4.06    |                                       |                          |
|                                                    | Middle occipital gyrus | 19  | L          | -32             | -91 | 24  | 3.47    |                                       |                          |
| <b>Model 3: Adult, ASD &gt; TDC</b>                |                        |     |            |                 |     |     |         |                                       |                          |
| Right dorsal medial<br>prefrontal cluster          | Superior frontal gyrus | 9   | R          | 12              | 56  | 34  | 5.37    | <0.001                                | 1186                     |
|                                                    | Superior frontal gyrus | 10  | R          | 8               | 51  | 42  | 4.87    |                                       |                          |
|                                                    | Superior frontal gyrus | 10  | R          | 5               | 68  | 9   | 4.77    |                                       |                          |
| Left anterior/ dorsal medial<br>prefrontal cluster | Superior frontal gyrus | 10  | L          | -7              | 56  | 1   | 4.81    | 0.006                                 | 555                      |
|                                                    | Superior frontal gyrus | 10  | L          | -7              | 72  | -3  | 4.74    |                                       |                          |
|                                                    | Medial frontal gyrus   | 10  | L          | -10             | 71  | 6   | 4.24    |                                       |                          |
| Left lateral prefrontal cluster                    | Middle frontal gyrus   | 10  | L          | -39             | 51  | -17 | 4.44    | 0.033                                 | 416                      |
|                                                    | Superior frontal gyrus | 10  | L          | -33             | 59  | -3  | 4.40    |                                       |                          |

|                                          |                          |     |     |     |     |     |      |       |     |
|------------------------------------------|--------------------------|-----|-----|-----|-----|-----|------|-------|-----|
| Cuneus cluster                           | Superior frontal gyrus   | 10  | L   | -27 | 57  | -18 | 3.50 | 0.020 | 457 |
|                                          | Cuneus                   | 18  | R   | 2   | -84 | 22  | 4.30 |       |     |
|                                          | Cuneus                   | 18  | ... | 0   | -76 | 32  | 4.25 |       |     |
|                                          | Cuneus                   | 18  | R   | 8   | -91 | 14  | 4.11 |       |     |
| <b><i>White Matter</i></b>               |                          |     |     |     |     |     |      |       |     |
| <b>Model 3: Adolescent, ASD &gt; TDC</b> |                          |     |     |     |     |     |      |       |     |
| Anterior corona radiata                  | Anterior cingulate gyrus | ... | R   | 29  | 21  | 10  | 3.97 | 0.001 | 882 |
|                                          |                          | ... | R   | 11  | 29  | -9  | 3.76 |       |     |
|                                          |                          | ... | R   | 26  | 39  | -5  | 3.52 |       |     |

Abbreviations: ASD, autism spectrum disorder; TDC, typically developing control; BA, Brodmann area; L, left; R, right; ellipses, not applicable; MNI, Montreal Neurological Institute.

<sup>a</sup>Statistical threshold was all set at FWE-corrected cluster-level  $p < 0.05$ , with cluster-forming voxel-level  $p < 0.005$ .
